# Supplementary material
Source: Springer Nature journal article supplement (https://www.springermedizin.de/resource/supplementary/12985_2013_2427_MOESM5_ESM.pdf/9607072)
Supplement: MOESM5 [file 9607072]

## A. Determination of expression level groups for cell clones

| Name                   | Non/low-expressers | Intermediate-expressers | High-expressers |
|------------------------|--------------------|-------------------------|-----------------|
| MFI range              | 0-15               | 16-50                   | >50             |
| % positive cells range | 0%-10%             | 11%-70%                 | 71%-100%        |

## B. Expression groups of TF-1 cell clones

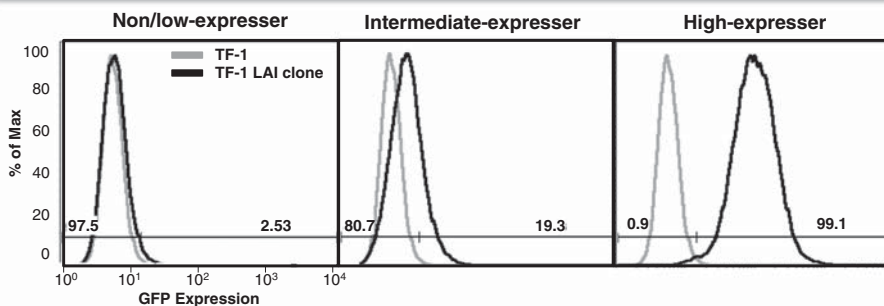

| Name     | Non/low-expressor | Intermediate-expressor | High-expressor | Total |
|----------|-------------------|------------------------|----------------|-------|
| LAI WT   | 4                 | 0                      | 1              | 5     |
| LAI 3T   | 3                 | 3                      | 0              | 6     |
| LAI 5T   | 2                 | 0                      | 2              | 4     |
| LAI 3T5T | 3                 | 2                      | 0              | 5     |

## C. Expression groups of U-937 cell clones

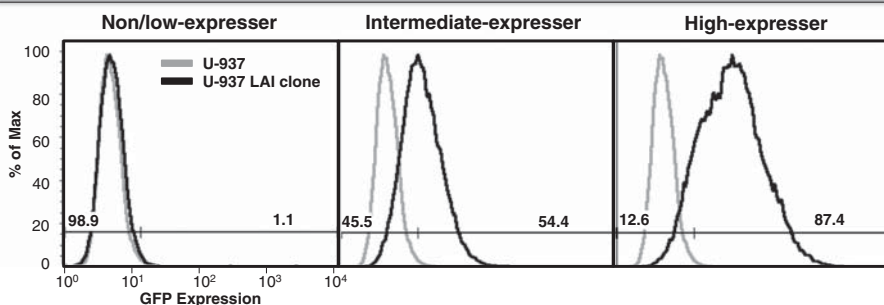

| Name     | Non/low-expressor | Intermediate-expressor | High-expressor | Total |
|----------|-------------------|------------------------|----------------|-------|
| LAI WT   | 10                | 1                      | 0              | 11    |
| LAI 3T   | 3                 | 1                      | 2              | 6     |
| LAI 5T   | 2                 | 2                      | 0              | 4     |
| LAI 3T5T | 0                 | 3                      | 0              | 3     |
